# Supplementary material for: Aqueous lubrication and wear properties of nonionic bottle-brush polymers
Source: Royal Society of Chemistry journal article supplement (doi:10.1039/d2ra02711a), 2022-01-01
Supplement: d2ra02711a1.pdf [file d2ra02711a1.pdf]

Electronic Supplementary Information

# Aqueous Lubrication and Wear Properties of Nonionic Bottle-Brush Polymers

*Hwi Hyun Moon,<sup>1</sup>Eun Jung Choi,<sup>1</sup> Sang Ho Yun,<sup>1</sup> Youn Chul Kim,<sup>2</sup> Thathan Premkumar<sup>1,3\*</sup>  
and Changsik Song<sup>1,\*</sup>*

<sup>1</sup>Department of Chemistry, Sungkyunkwan University, Suwon, Gyeonggi, 16419, Republic of Korea

<sup>2</sup>Department of Chemical Engineering, Sungkyunkwan University, Suwon, Gyeonggi, 16419,  
Republic of Korea

<sup>3</sup>The University College, Sungkyunkwan University, Suwon, Gyeonggi 16419, Republic of Korea.

\*Email: tprem@skku.edu (TP); songcs@skku.edu (CS).

## Table of Contents

### 1. Supplementary Figures and Tables

|            |                                                                      |    |
|------------|----------------------------------------------------------------------|----|
| Table S1.  | Molecular weights of PS, BPS, PHEMA and BPHEMA.                      | S2 |
| Figure S1. | GPC traces of PS, BPS, PHEMA and BPHEMA.                             | S2 |
| Table S2.  | Friction coefficients of Si wafer, PHEMA, BPHEMA and BPS             | S3 |
| Table S3.  | Friction coefficients of BPHEMA complex with HA and PVA.             | S3 |
| Figure S2. | Depth data of BPHEMA complex with HA and PVA after<br>wear analysis. | S4 |
| Table S4.  | T <sub>g</sub> data of PS, BPS, PHEMA, BPHEMA                        | S4 |
| Figure S3. | Storage modulus master curve of PS and BPS                           | S5 |

### 2. NMR spectra of the synthesized compounds S6

**Table S1.** Molecular weights of polymers.

| Entry | Linear(P) and Bottle-brush<br>polymer(BP) | $M_n$ [Da] | $M_w/M_n$ |
|-------|-------------------------------------------|------------|-----------|
| 1     | PS                                        | 2,300      | 1.06      |
| 2     | BPS                                       | 14,000     | 1.07      |
| 3     | PHEMA                                     | 6,800      | 1.55      |
| 4     | BPHEMA                                    | 49,300     | 1.48      |

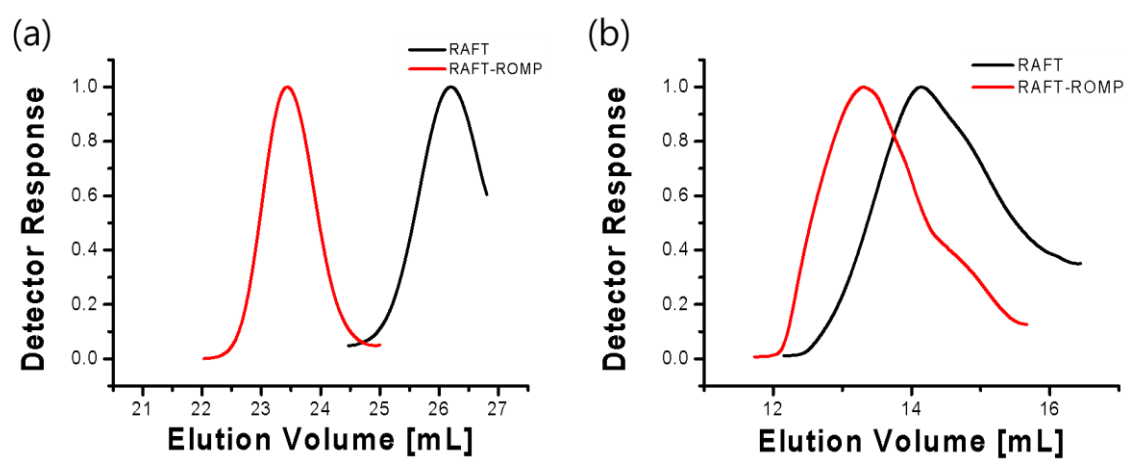

**Figure S1.** GPC traces of the chain extensions to BPS and BPHEMA.

**Table S2.** Friction coefficients of Si wafer, PHEMA, BPHEMA, and BPS.

|          | Friction coefficient |           |
|----------|----------------------|-----------|
|          | Dry                  | In water  |
| Si-wafer | 0.86±0.01            | 0.37±0.04 |
| BPHEMA   | 0.73±0.02            | 0.27±0.04 |
| BPS      | 0.46±0.15            | 0.30±0.15 |
| PHEMA    | 0.77±0.04            | 0.35±0.04 |

**Table S3.** Friction coefficients of BPHEMA complexes with HA and PVA.

|                | Friction coefficient |            |
|----------------|----------------------|------------|
|                | Dry                  | In water   |
| HA             | 0.41±0.14            | 0.46±0.05  |
| HA:BPHEMA(2:1) | 0.49±0.10            | 0.36±0.06  |
| HA:BPHEMA(1:1) | 0.56±0.06            | 0.36±0.03  |
| HA:BPHEMA(1:2) | 0.56±0.07            | 0.30±0.006 |

  

|                 | Friction coefficient |            |
|-----------------|----------------------|------------|
|                 | Dry                  | In water   |
| PVA             | 0.50±0.04            | 0.36±0.04  |
| PVA:BPHEMA(2:1) | 0.52±0.05            | 0.40±0.05  |
| PVA:BPHEMA(1:1) | 0.54±0.08            | 0.39±0.004 |
| PVA:BPHEMA(1:2) | 0.66±0.10            | 0.37±0.05  |

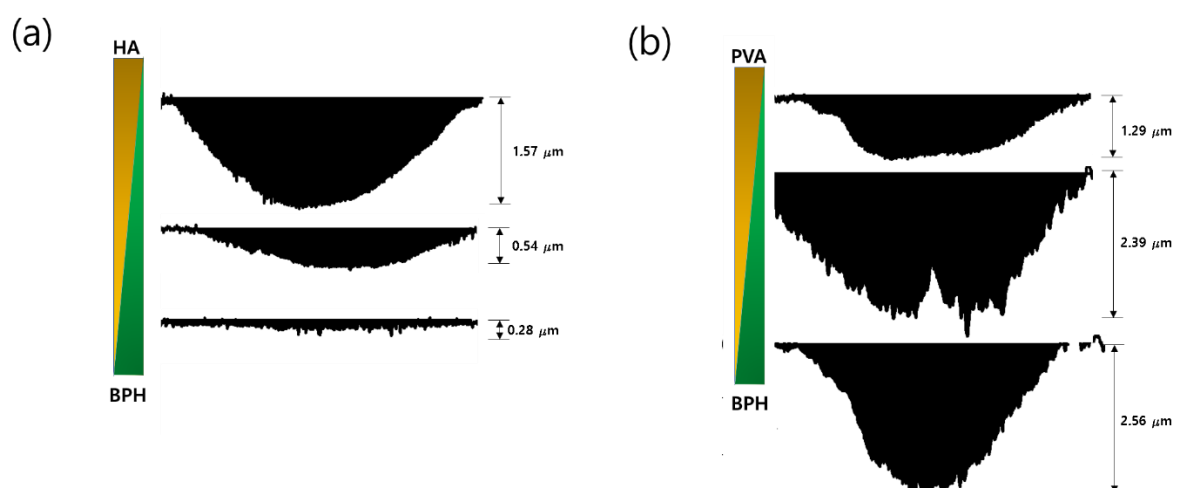

**Figure S2.** Depth data of BPHEMA complexes with (a) HA and (b) PVA after wear analysis.

**Table S4.** Glass transition temperatures of PS, PHEMA, BPS, and BPHEMA analyzed by DSC.

| Sample | $T_g$ (°C) |
|--------|------------|
| PS     | 59.3       |
| PHEMA  | 69.0       |
| BPS    | 73.0       |
| BPHEMA | 90.6       |

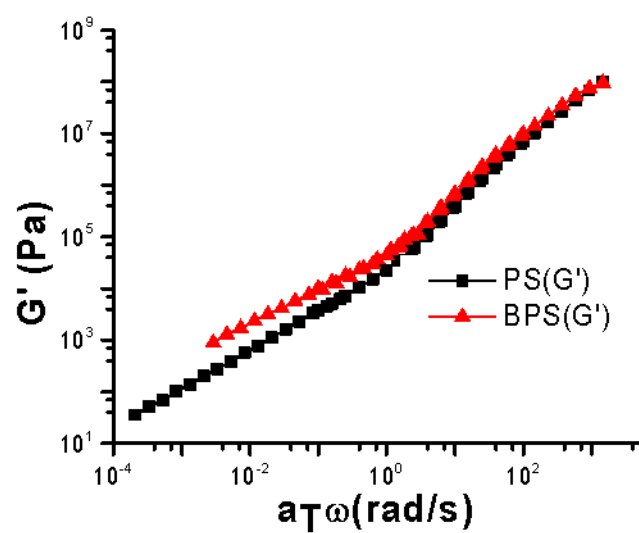

**Figure S3.** Storage modulus master curve of PS and BPS at  $T_{\text{ref}} = T_g + 40$  °C

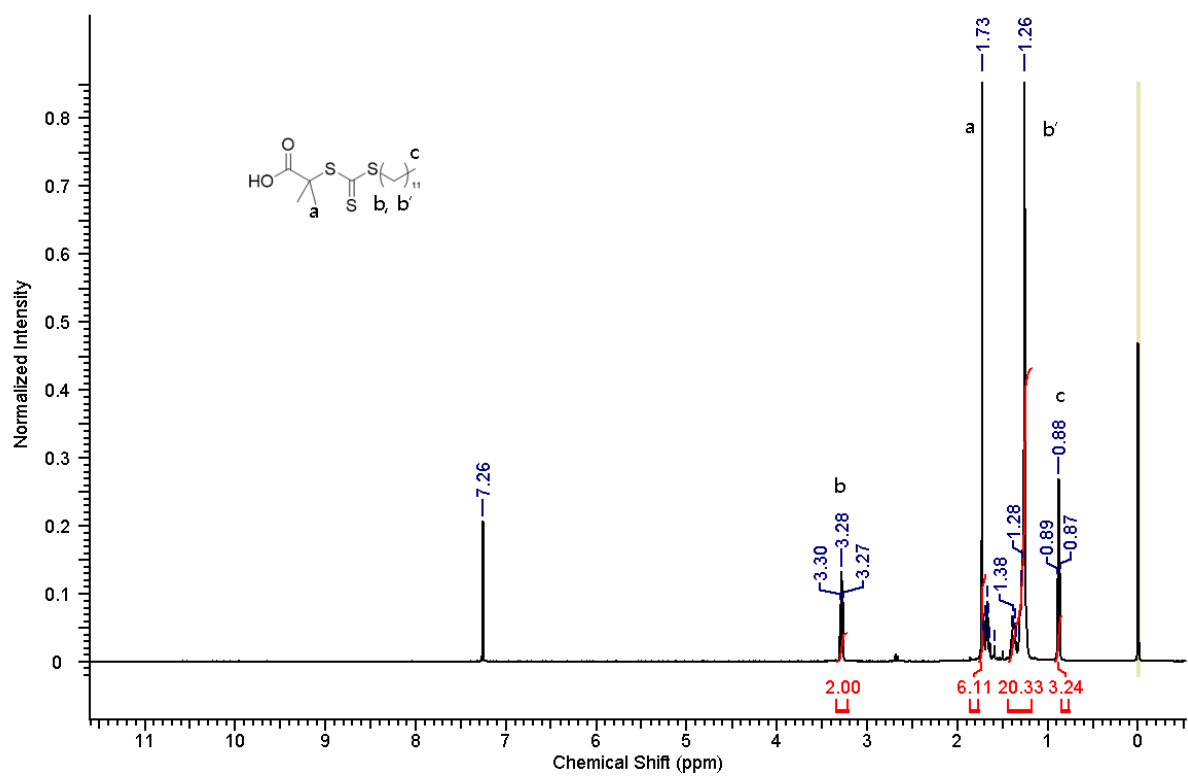

Figure S4.  $^1\text{H}$  NMR spectrum of CTA (500 MHz,  $\text{CDCl}_3$ ).

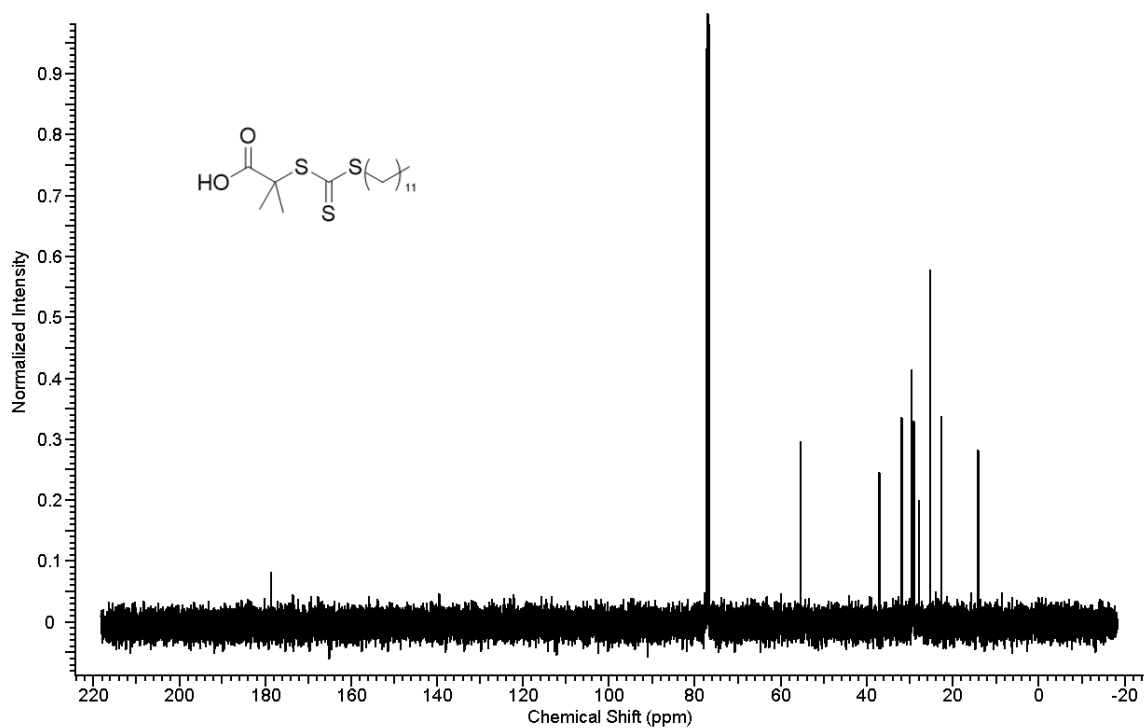

Figure S5.  $^{13}\text{C}$  NMR spectrum of the compound CTA (125 MHz,  $\text{CDCl}_3$ ).

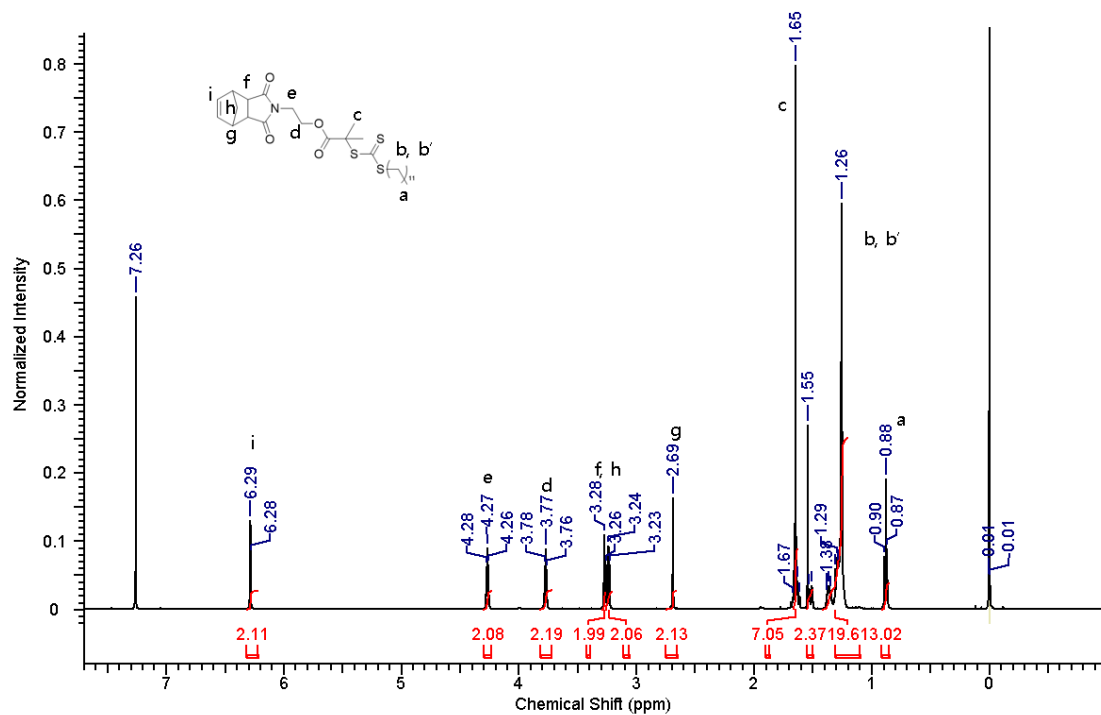

**Figure S6.**  $^1\text{H}$  NMR spectrum of CTA-norbornene (500 MHz,  $\text{CDCl}_3$ ).

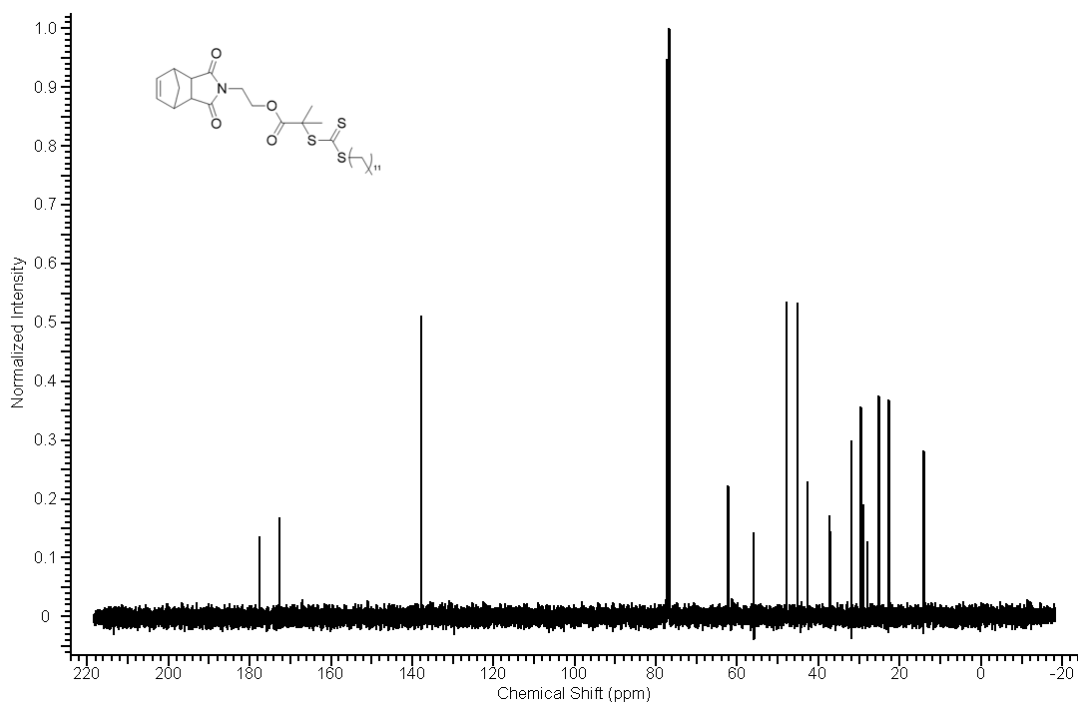

**Figure S7.**  $^{13}\text{C}$  NMR spectrum of the compound CTA-norbornene (125 MHz,  $\text{CDCl}_3$ ).

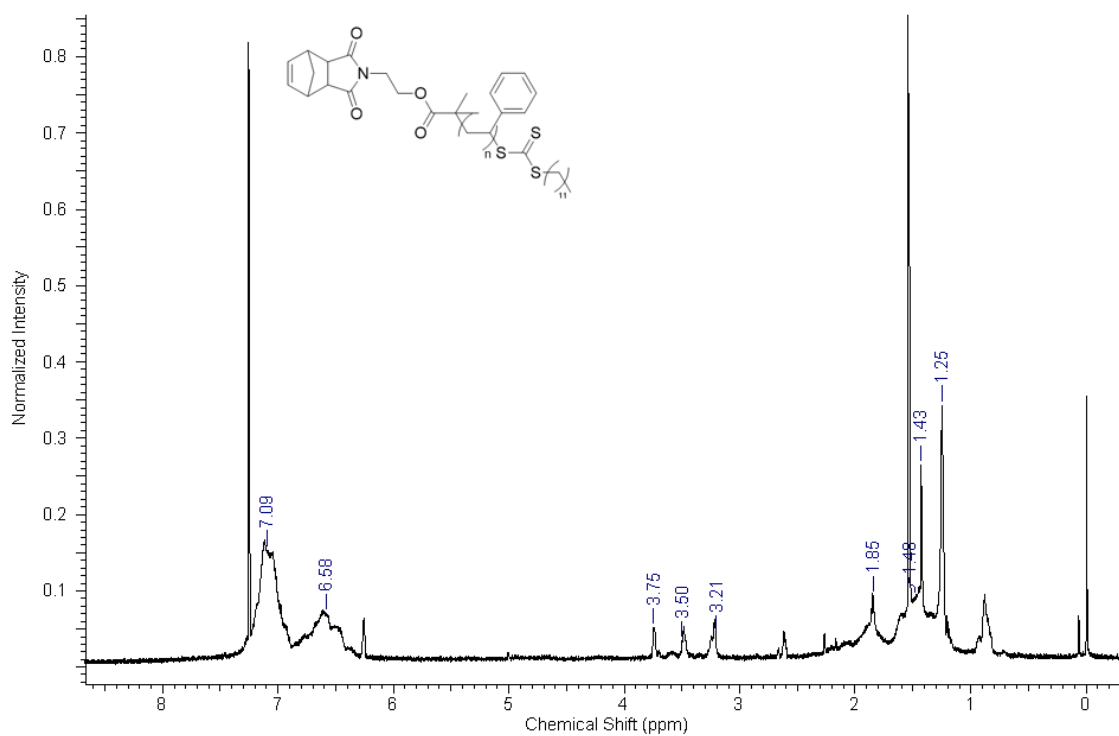

**Figure S8.**  $^1\text{H}$  NMR spectrum of PS (500 MHz,  $\text{CDCl}_3$ ).

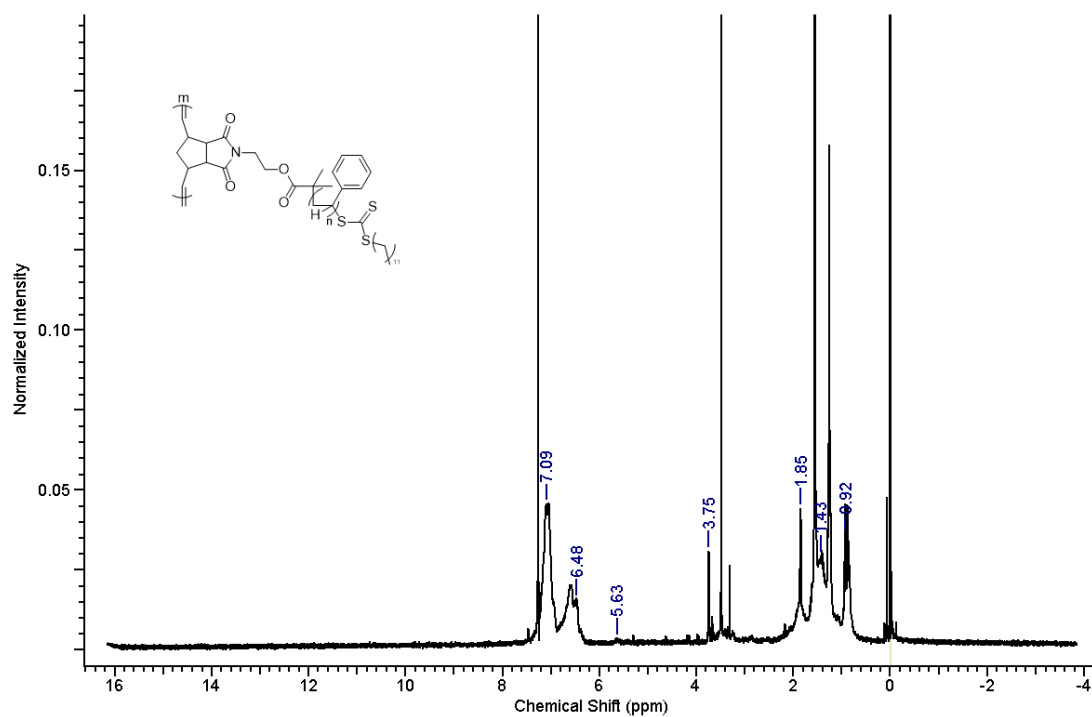

**Figure S9.**  $^1\text{H}$  NMR spectrum of BPS (500 MHz,  $\text{CDCl}_3$ ).



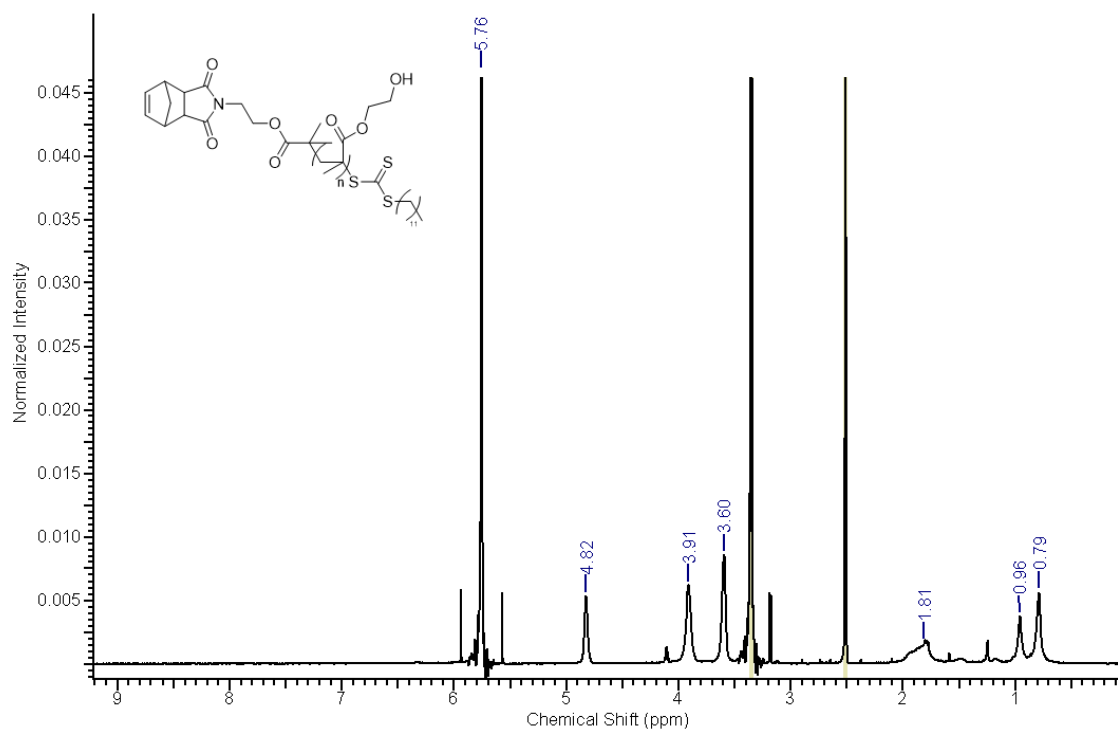

**Figure S10.**  $^1\text{H}$  NMR spectrum of **PHEMA** (500 MHz,  $\text{DMSO-}d_6$ ).

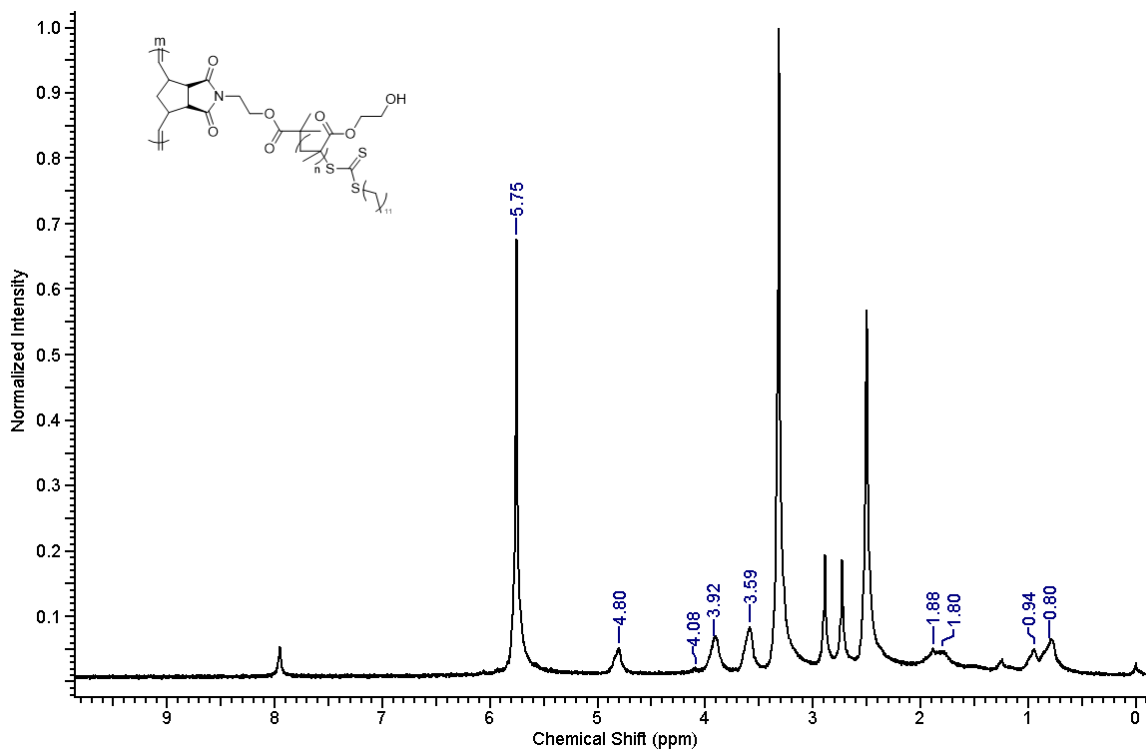

**Figure 11.**  $^1\text{H}$  NMR spectrum of **BPHEMA** (500 MHz,  $\text{DMSO-}d_6$ ).
